# Supplementary material
Source: PubMed Central journal article supplement (PMC8072370)
Supplement: pnas.2024463118.sapp.pdf [file pnas.2024463118.sapp.pdf]

Supplementary Information for

**Cardenolides, toxicity and the costs of sequestration in the coevolutionary interaction between monarchs and milkweeds**

Anurag A. Agrawal<sup>1,2\*</sup>, Katalin Böröczky<sup>1</sup>, Meena Haribal<sup>3</sup>, Amy P. Hastings<sup>1</sup>, Ronald A. White<sup>1</sup>  
Ren-Wang Jiang<sup>4</sup>, Christophe Duplais<sup>5</sup>

Email: agrawal@cornell.edu

**This PDF file includes:**

Figures S1 to S11  
Tables S1 to S7  
References

|                                                                                                                                                                                                                                     |           |
|-------------------------------------------------------------------------------------------------------------------------------------------------------------------------------------------------------------------------------------|-----------|
| Fig. S1. Sample HPLC chromatograms. ....                                                                                                                                                                                            | 3         |
| Fig. S2. Voruscharin painted on cardenolide-free milkweed leaves of <i>A. tuberosa</i> are converted to calactin and calotropin as revealed by LC-ESI- HRMS (n=4). ....                                                             | 4         |
| Fig. S3. Voruscharin putative biosynthesis in <i>Asclepias curassavica</i> and its degradation pathway in monarch gut. ....                                                                                                         | 5         |
| Fig. S4. Uscharidin relative concentrations in samples. ....                                                                                                                                                                        | 6         |
| Fig. S5. Voruscharin stability assay at different pH values. ....                                                                                                                                                                   | 7         |
| Fig. S6. Monarch caterpillar growth predicted by A) total leaf cardenolide and B) leaf voruscharin concentrations. ....                                                                                                             | 8         |
| Fig. S7. MS/MS product ion mass spectrum from [M+FA-H] <sup>-</sup> adduct of voruscharin. ....                                                                                                                                     | 9         |
| Figure S8. MS/MS product ion mass spectrum from [M+FA-H] <sup>-</sup> adduct of uscharidin. ...                                                                                                                                     | 10        |
| Figure S9. MS/MS product ion mass spectrum from [M+FA-H] <sup>-</sup> adduct of calotropin. ....                                                                                                                                    | 11        |
| Figure S10. MS/MS product ion mass spectrum from [M+H] <sup>+</sup> adduct of quercetin-rhamno-hexoside. ....                                                                                                                       | 12        |
| Figure S11. MS/MS product ion mass spectrum from [M+H] <sup>+</sup> adduct of quercetin-rhamno-di-hexoside. ....                                                                                                                    | 13        |
| Table S1. Pairwise phenotypic Pearson correlations between the nine major cardenolides quantified from <i>Asclepias curassavica</i> leaves grown in a common environment (n=212). ....                                              | 14        |
| Table S2. Principal component analysis loadings for the nine individual cardenolides on the two main principal components (Eigen values >1) for plant (85% variation explained) and monarch (72% variation explained) tissues. .... | 15        |
| Table S3. PERMANOVA results analyzing metabolic data based on Bray-Curtis dissimilarities. ....                                                                                                                                     | 16        |
| Table S4. The relative inhibitory potential of seven isolated cardenolides on the sensitive porcine and typically-resistant monarch butterfly Na-K-ATPase (See also Figure 3). ....                                                 | 17        |
| Table S5. Poisson GLM model fits for predicting monarch oviposition on 212 <i>Asclepias curassavica</i> plants in a common greenhouse environment. ....                                                                             | 18        |
| Table S6. Effects of two quercetin glycosides on monarch butterfly oviposition, tested with pure compounds in cages. >1 gram fresh leaf equivalent of each compound was added to each sponge. ....                                  | 19        |
| <b>Table S7. HRMS data of the cardenolides ions detected in samples. ....</b>                                                                                                                                                       | <b>20</b> |
| <b>References. ....</b>                                                                                                                                                                                                             | <b>22</b> |

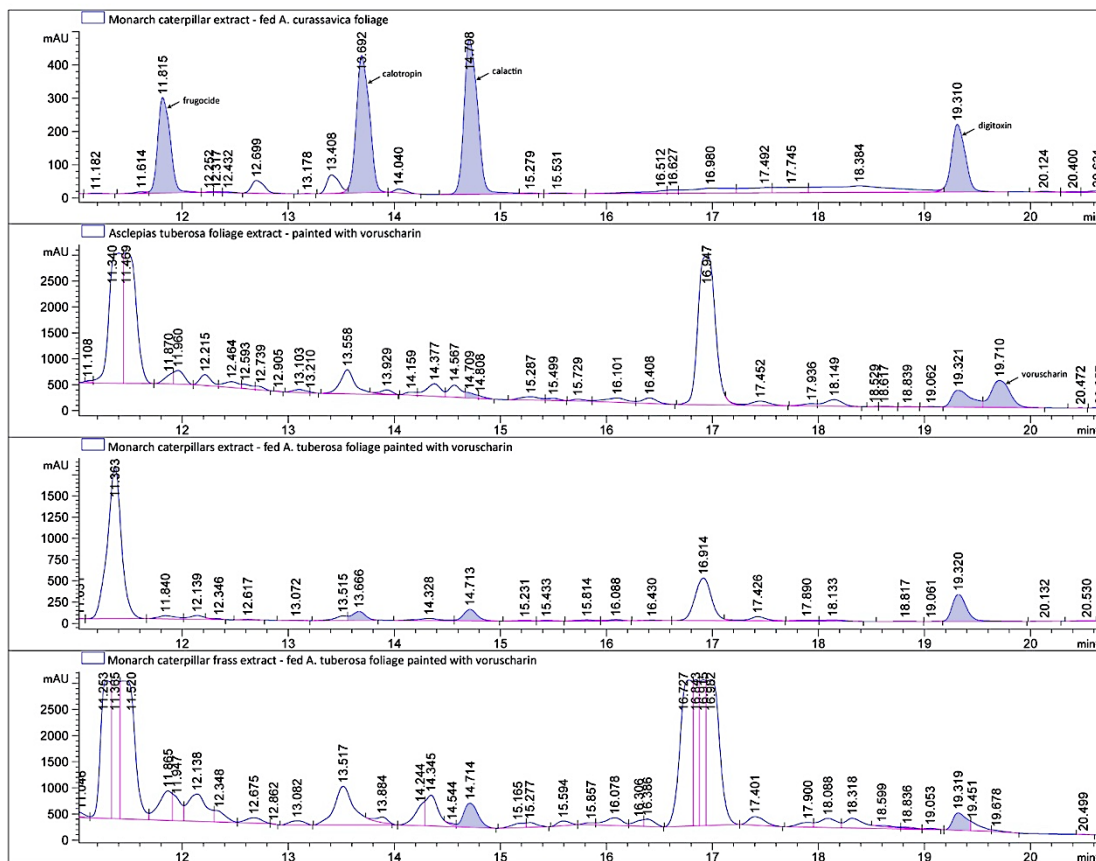

**Fig. S1. Sample HPLC chromatograms.**

(A) Monarch caterpillar feeding on *Asclepias curassavica*, (B) *A. tuberosa* foliage painted with voruscharin, (C) monarch caterpillars fed *A. tuberosa* painted with voruscharin, and (D) monarch frass from feeding on *A. tuberosa* painted with voruscharin. Digitoxin (RT 19.31-19.32) was added as the internal standard.

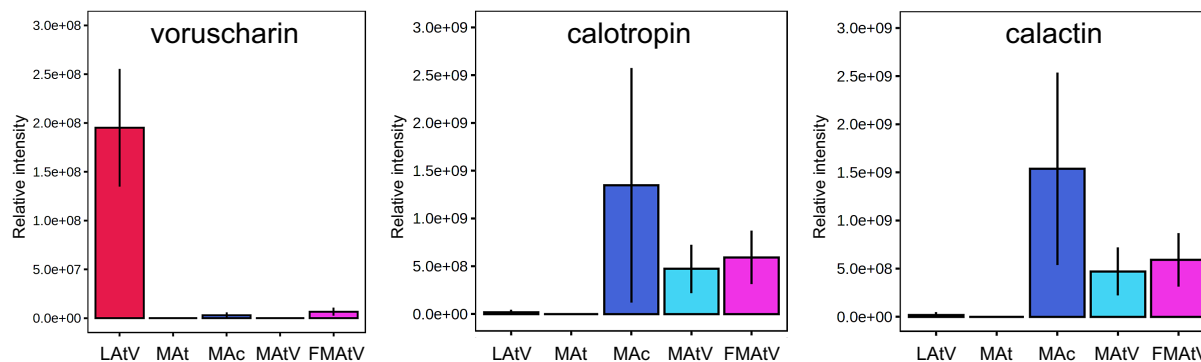

**Fig. S2. Voruscharin painted on cardenolide-free milkweed leaves of *A. tuberosa* are converted to calactin and calotropin as revealed by LC-ESI- HRMS (n=4).**

Ion mass of voruscharin, calactin and calotropin respectively detected at 590.2775 ( $[M+H]^+$ ), 533.2745 ( $[M+H]^+$ ), and 590.2741 ( $[M+H]^+$ ) in positive ionization mode. Shown are means  $\pm$  SE relative concentrations (normalized mass spec ion abundance). LATv: leaf of *A. tuberosa* painted with voruscharin; MA: monarchs on *A. tuberosa*; MAc: monarchs on *A. curassavica*; MATv: monarchs on *A. tuberosa* painted with voruscharin; FMAv: frass from monarchs fed *A. tuberosa* painted with voruscharin.

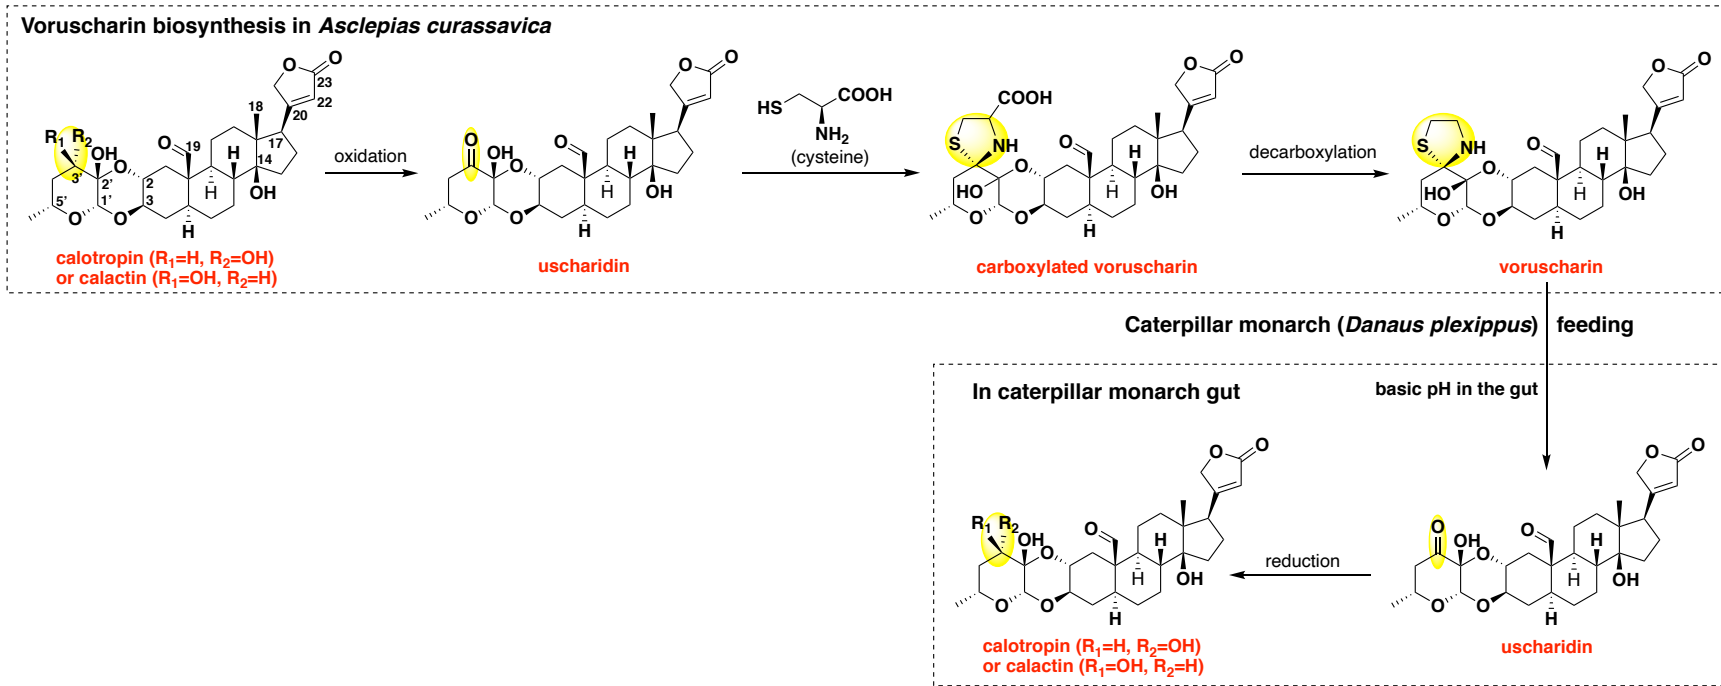

**Fig. S3. Voruscharin putative biosynthesis in *Asclepias curassavica* and its degradation pathway in monarch gut.**  
The functional group in position C3' is highlighted in yellow to show the successive steps leading from calactin/calotropin to voruscharin.

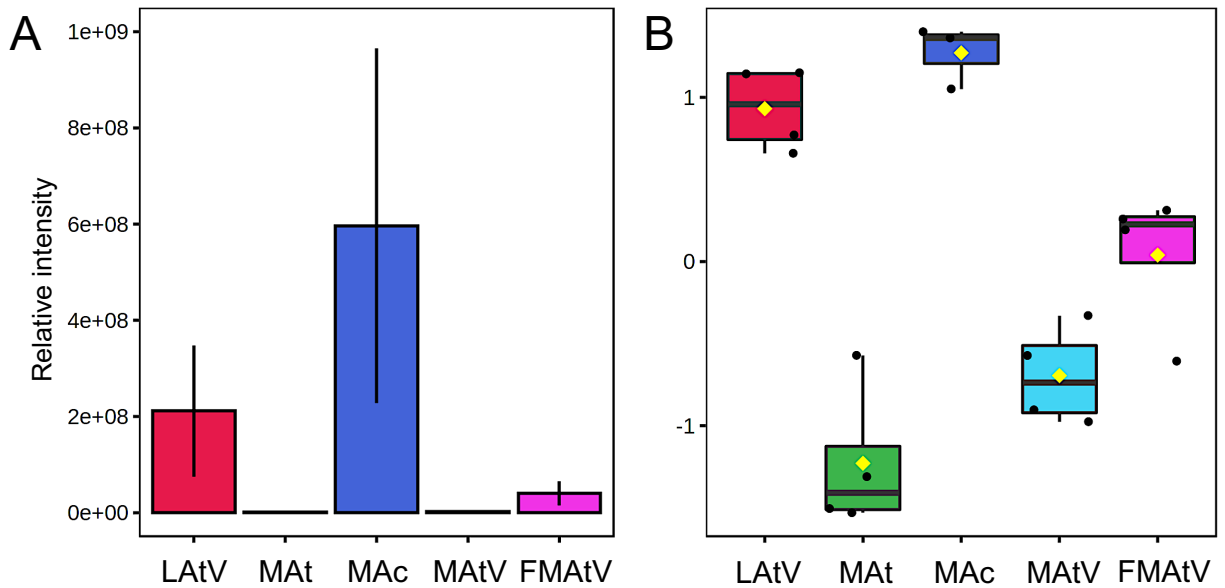

**Fig. S4. Ushardin relative concentrations in samples.**

The bar plots show (A) the original values (mean +/- SD). The box and whisker plots (B) summarize the normalized values. The mean concentration of each group is indicated with a yellow diamond. Ion mass detected at 531.2588 ( $[M+H]^+$ ) in positive ionization mode. LAtV: leaf of *A. tuberosa* painted with voruscharin; MAt: monarchs on *A. tuberosa*; MAc: monarchs on *A. curassavica*; MAtV: monarchs on *A. tuberosa* painted with voruscharin; FMAtV: frass from monarchs fed *A. tuberosa* painted with voruscharin.

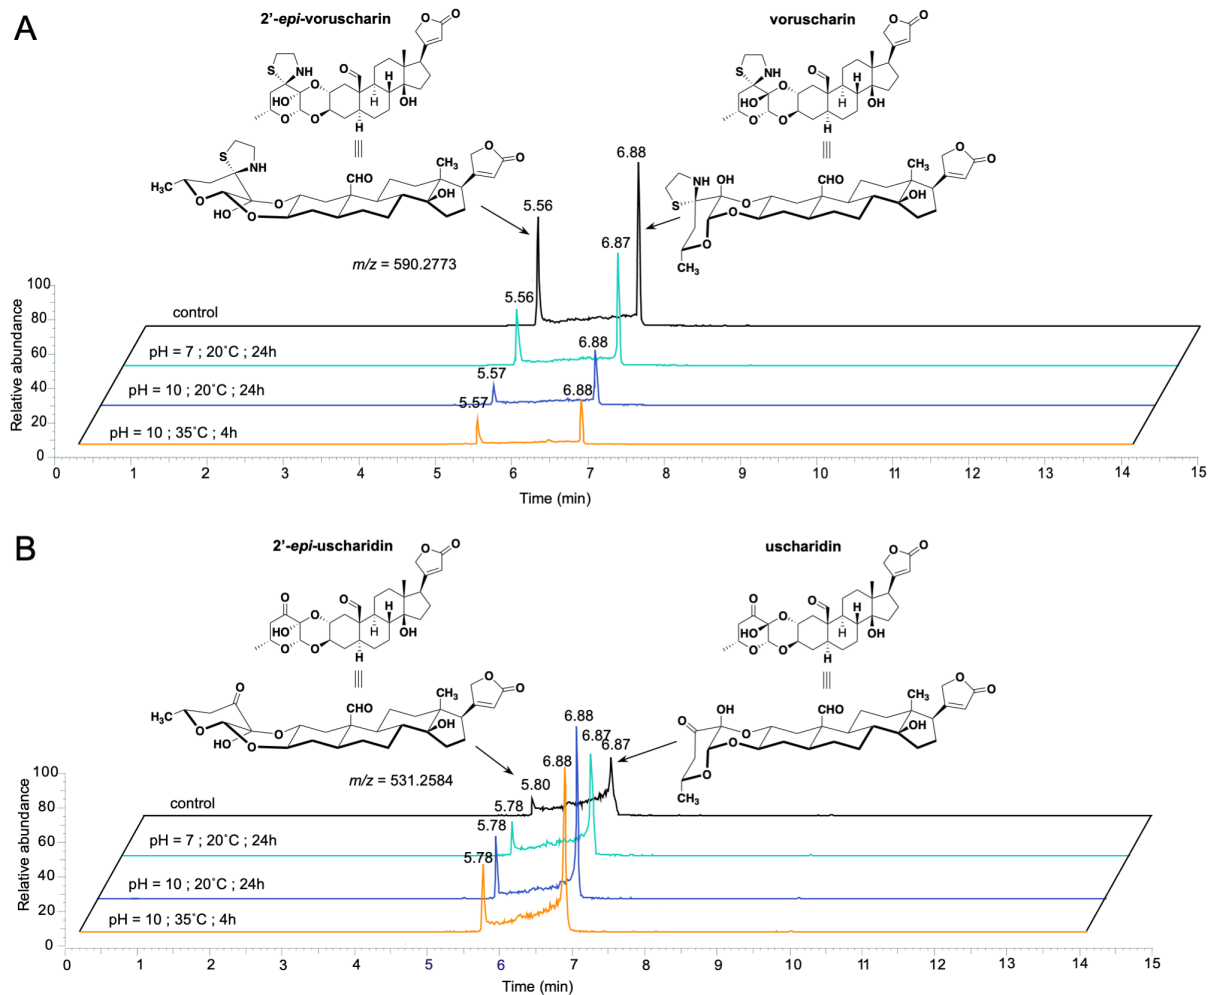

**Fig. S5. Voruscharin stability assay at different pH values.**

Chromatograms of voruscharin (A) and uscharidin (B), and corresponding epimers, after being stored at different temperatures and pH values. The control was stored at  $-20^{\circ}\text{C}$  for 24h. The epimer's retention times was anticipated based on previous results of 2'-epi-uscharidin (1).

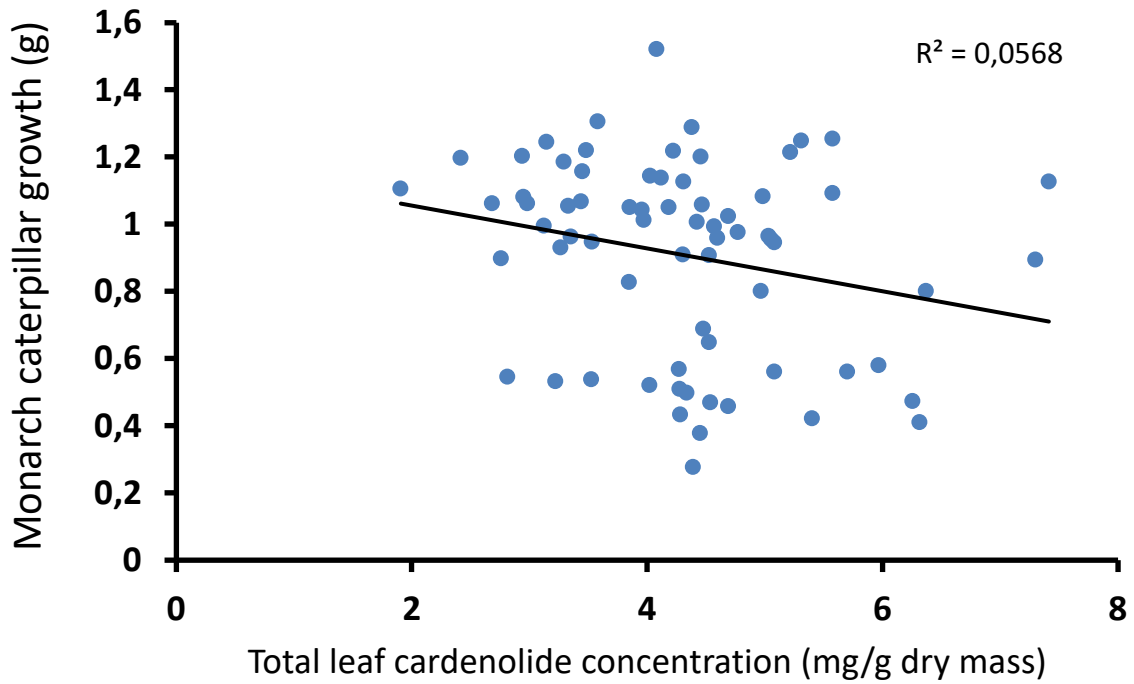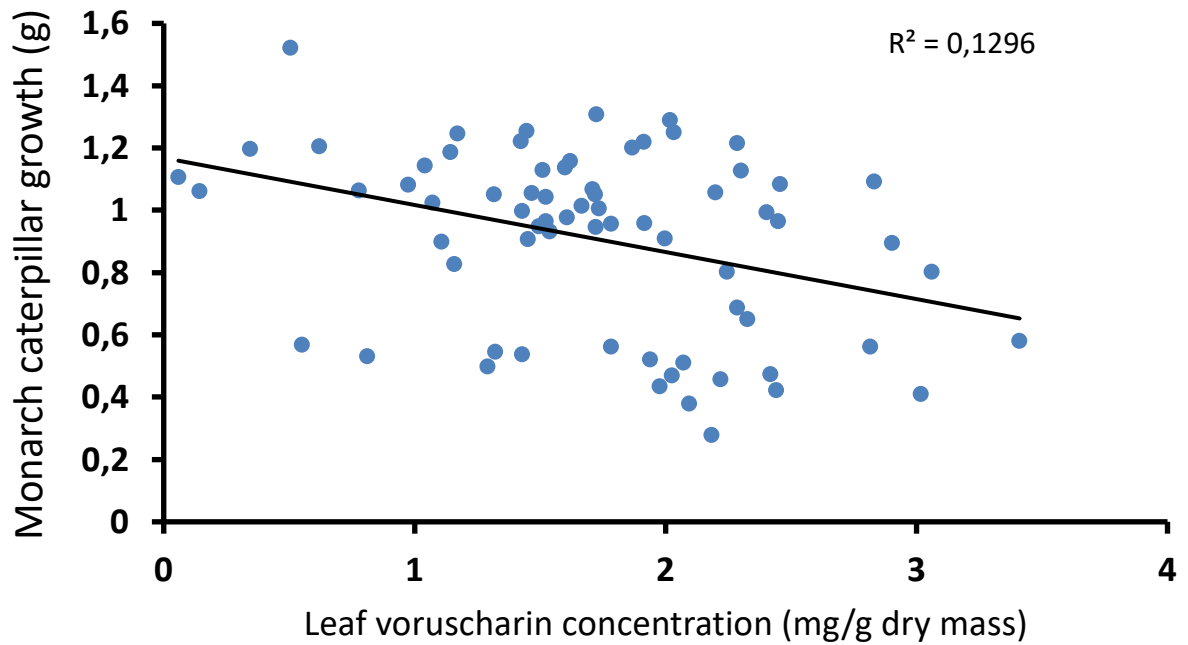

**Fig. S6. Monarch caterpillar growth predicted by A) total leaf cardenolide and B) leaf voruscharin concentrations.**

Note the weak relationships compared to sequestered cardenolides presented in Fig. 2 (and main text, which explained >60% of the variation in caterpillar growth).



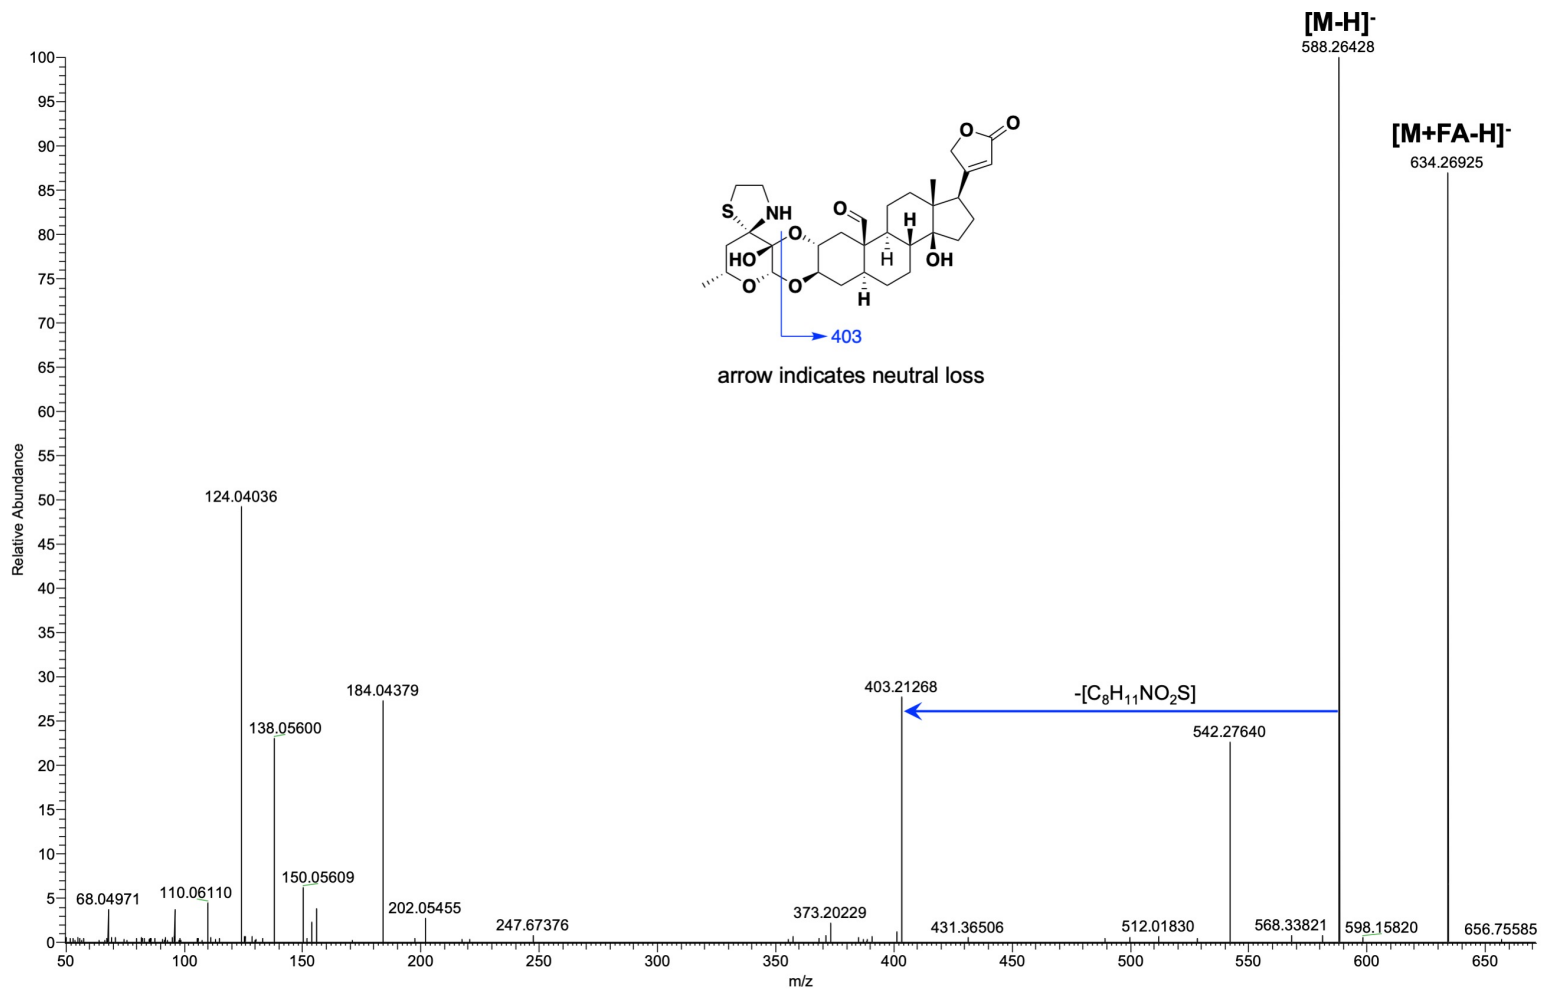

**Fig. S7. MS/MS product ion mass spectrum from [M+FA-H]<sup>-</sup> adduct of voruscharin.**

The MS<sup>2</sup> spectrum of voruscharin was deposited to the GNPS database.

<https://gnps.ucsd.edu/ProteoSAFe/gnpslibraryspectrum.jsp?SpectrumID=CCMSLIB00005724352#%7B%7D>

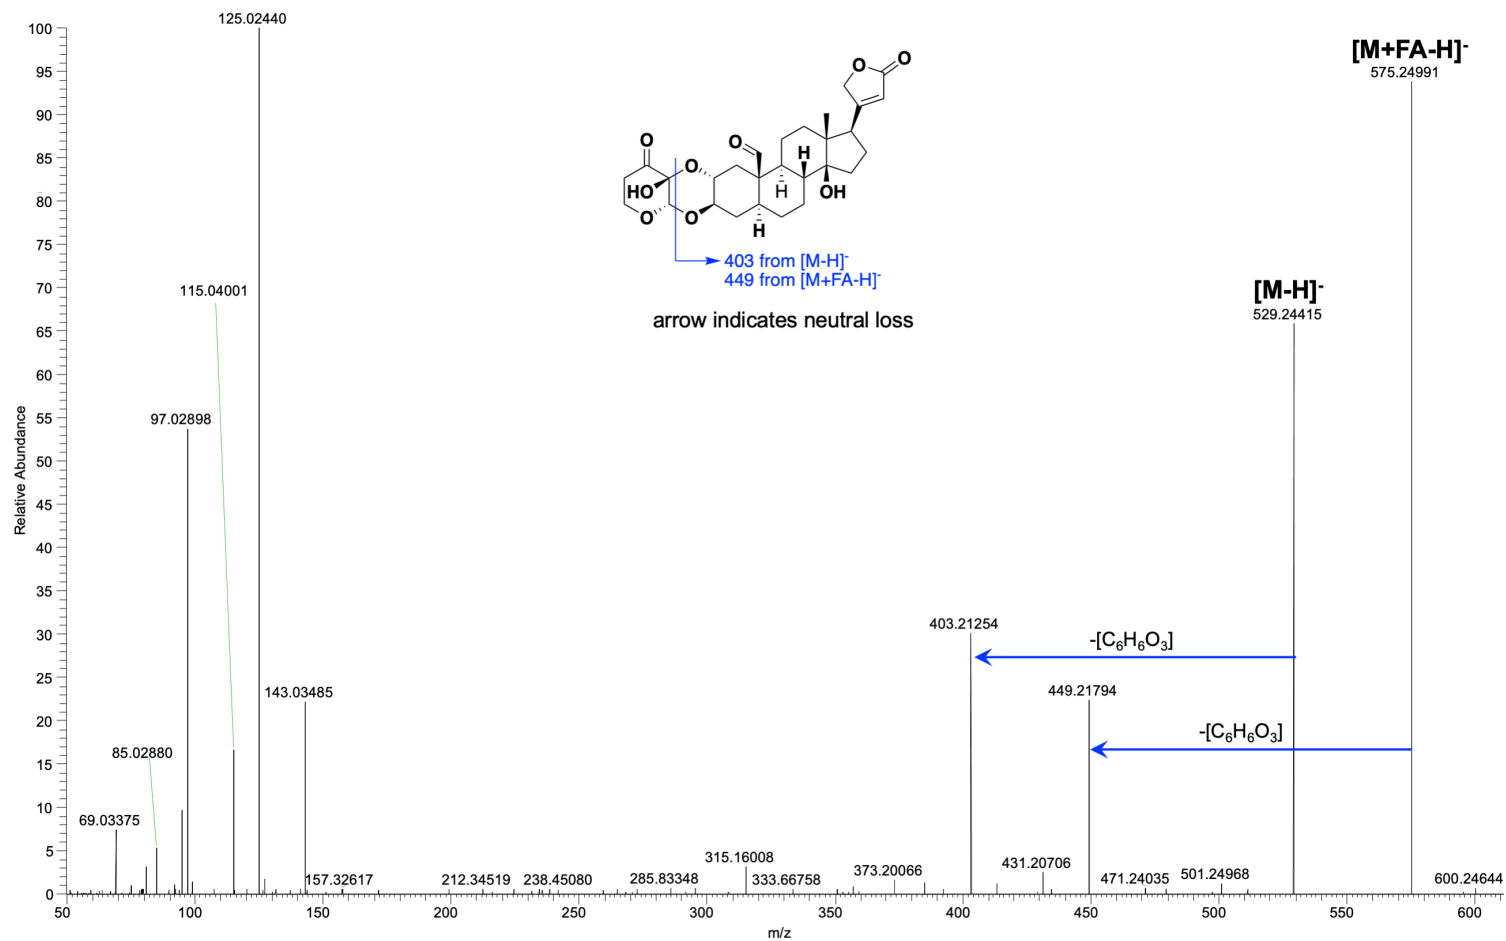

**Figure S8. MS/MS product ion mass spectrum from [M+FA-H]<sup>-</sup> adduct of uscharidin.**

The MS<sup>2</sup> spectrum of uscharidin was deposited to the GNPS database.

<https://gnps.ucsd.edu/ProteoSAFe/gnpslibraryspectrum.jsp?SpectrumID=CCMSLIB00005724353#%7B%7D>

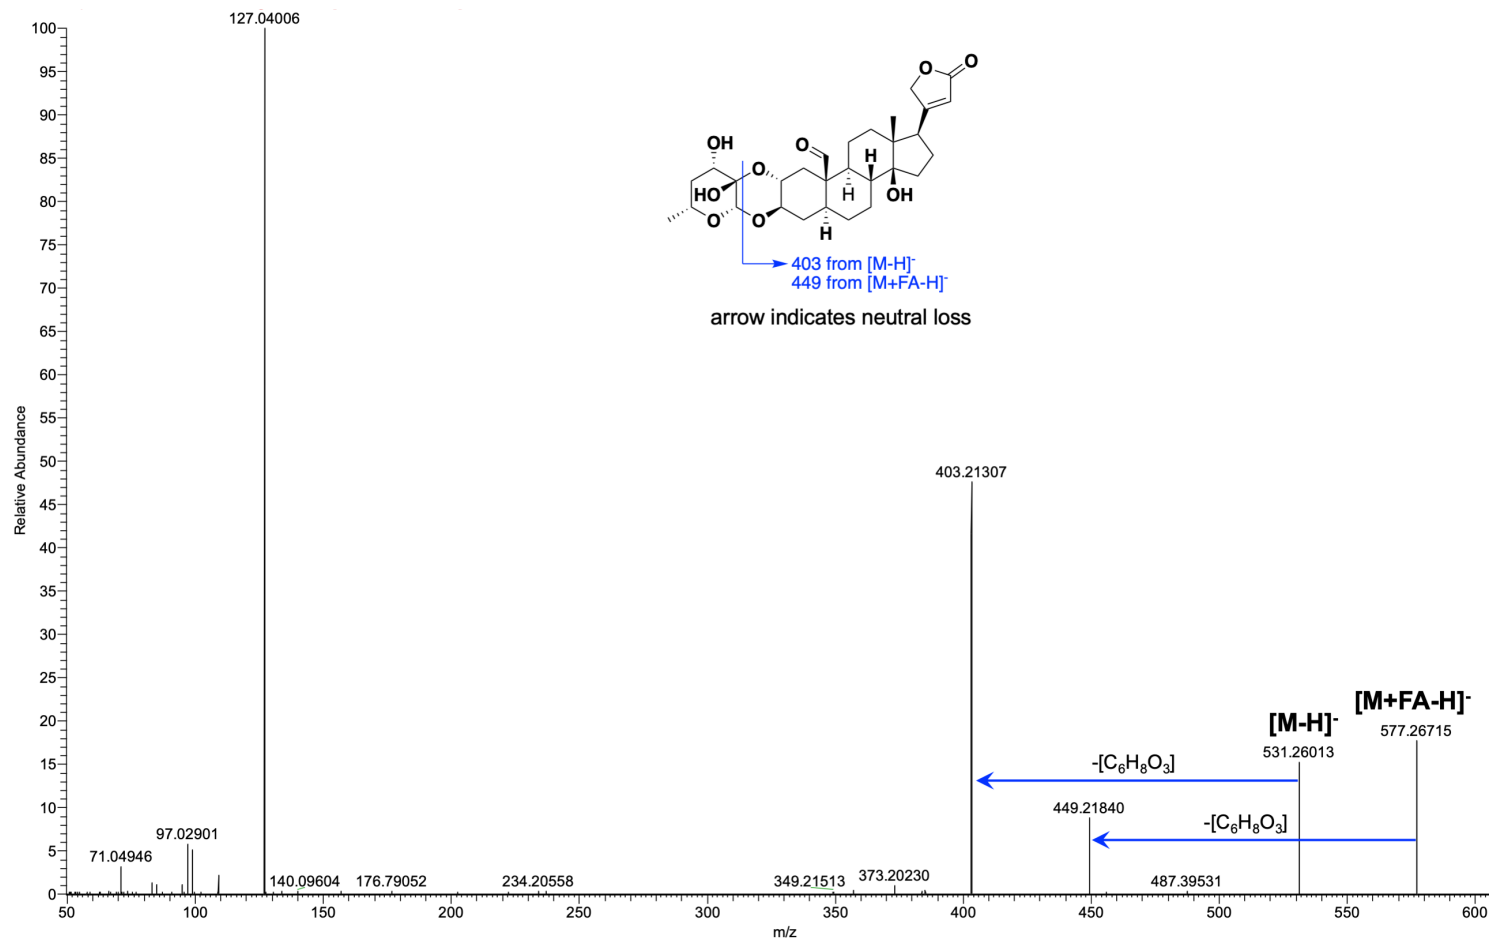

**Figure S9. MS/MS product ion mass spectrum from  $[M+FA-H]^-$  adduct of calotropin.**

The MS<sup>2</sup> spectrum of calactin/calotropin was deposited to the GNPS database.

<https://gnps.ucsd.edu/ProteoSAFe/gnpslibraryspectrum.jsp?SpectrumID=CCMSLIB00005724354#%7B%7D>

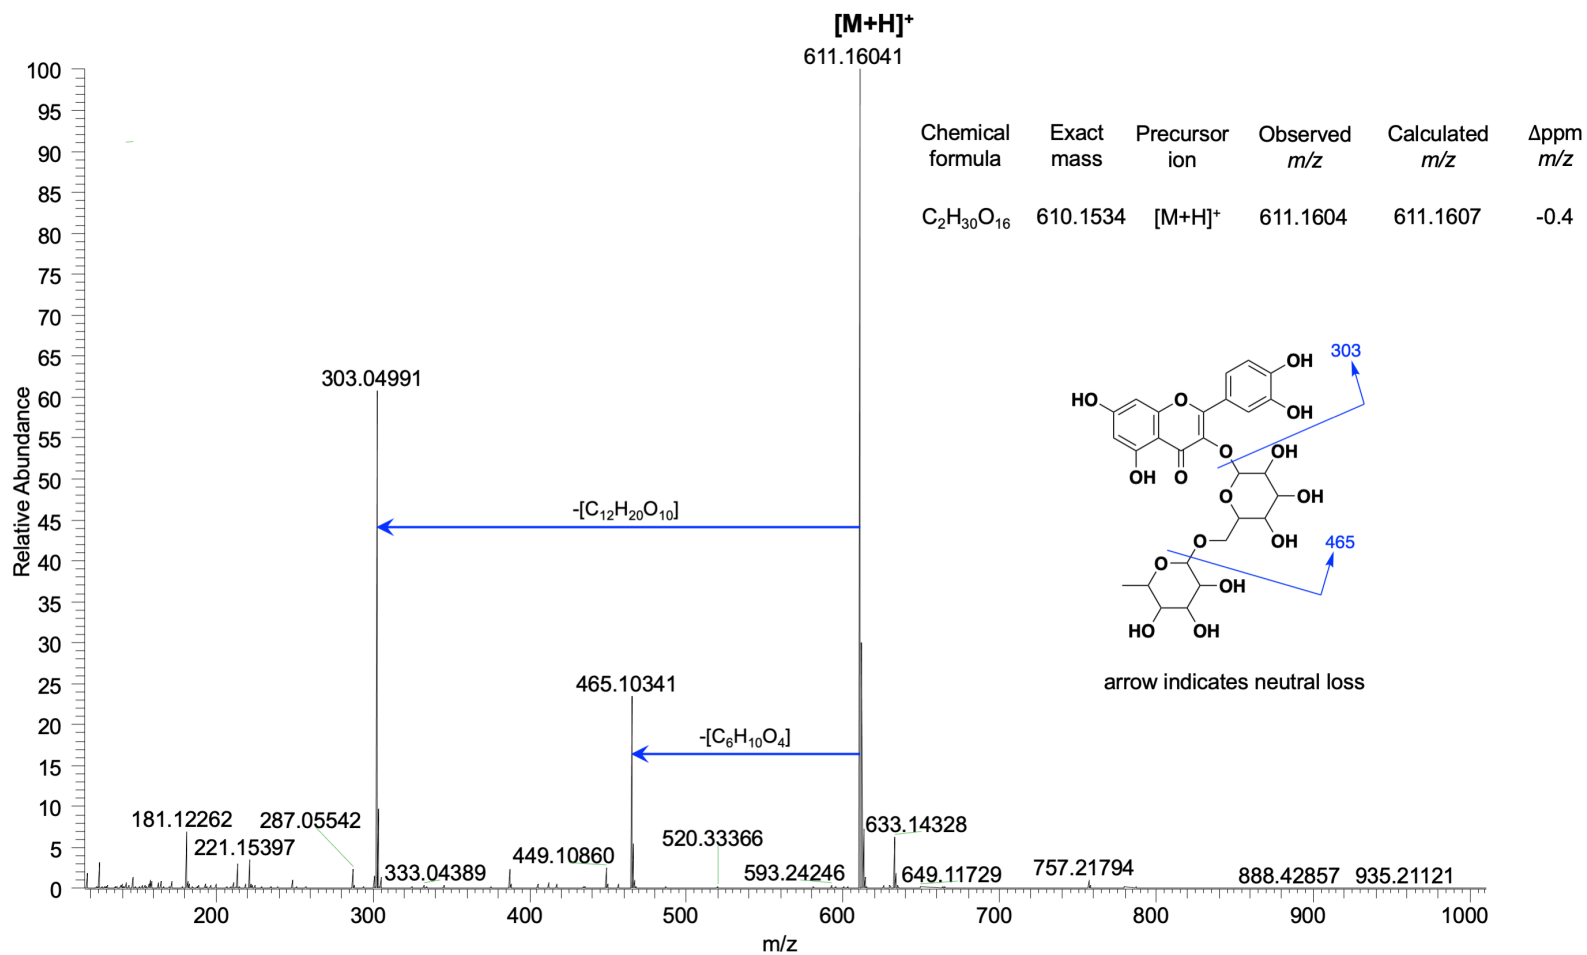

**Figure S10. MS/MS product ion mass spectrum from [M+H]<sup>+</sup> adduct of quercetin-rhamno-hexoside.**

Based on previous phytochemical studies of characterized flavonols in *A. curassavica* (2) the structure is either quercetin 3-O- $\alpha$ -(2''-O- $\alpha$ -L-rhamnopyranosyl)- $\beta$ -D-galactopyranoside or quercetin 3-O- $\alpha$ -(2''-O- $\alpha$ -L-rhamnopyranosyl)- $\beta$ -D-glucopyranosyl (rutin).

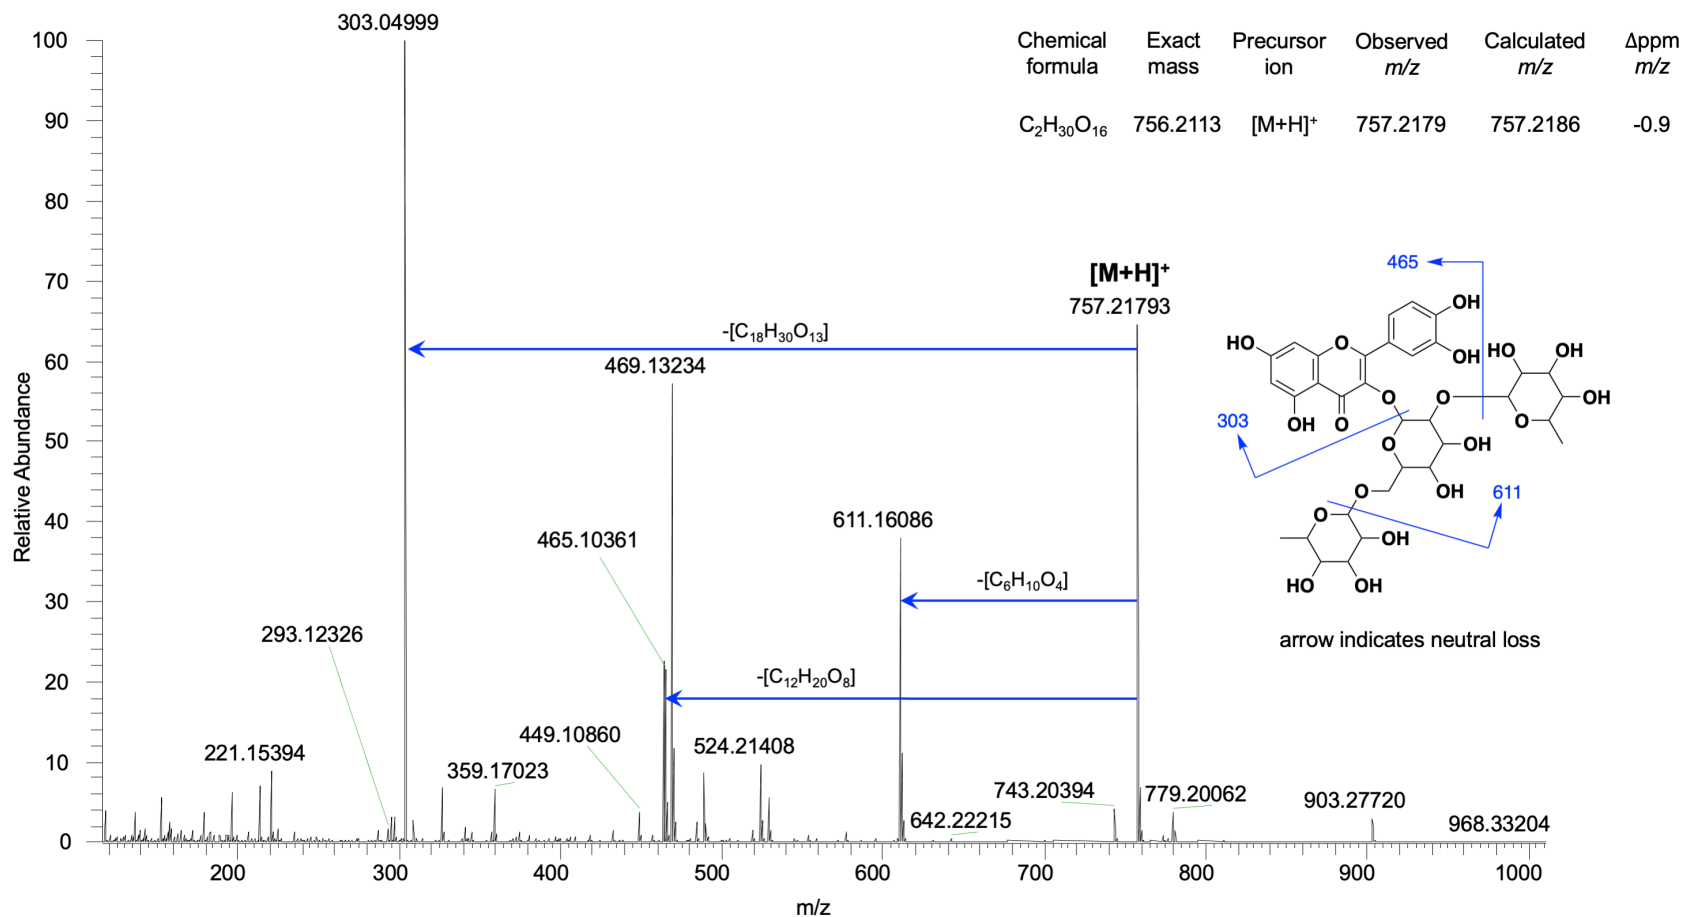

**Figure S11. MS/MS product ion mass spectrum from  $[M+H]^+$  adduct of quercetin-rhamno-di-hexoside.**

Based on previous phytochemical studies of characterized flavonols in *A. curassavica* (2) the structure is either quercetin 3-O-(2'',6''-di- $\alpha$ -L-rhamnopyranosyl)- $\beta$ -D-galactopyranoside or quercetin 3-O-(2'',6''-O-di- $\alpha$ -L-rhamnopyranosyl)- $\beta$ -D-glucopyranoside.

**Table S1. Pairwise phenotypic Pearson correlations between the nine major cardenolides quantified from *Asclepias curassavica* leaves grown in a common environment (n=212).**

Where compounds were not identified their retention time is given. Four non-significant correlations are highlighted in grey.

|             |           | <b>r</b> | <b>P</b> |
|-------------|-----------|----------|----------|
| Frugoside   | 9.95      | 0.609    | <.0001   |
| 12.54       | 9.95      | 0.666    | <.0001   |
| 12.54       | Frugoside | 0.642    | <.0001   |
| 14.66       | 9.95      | 0.757    | <.0001   |
| 14.66       | Frugoside | 0.722    | <.0001   |
| 14.66       | 12.54     | 0.905    | <.0001   |
| Calactin    | 9.95      | 0.727    | <.0001   |
| Calactin    | Frugoside | 0.747    | <.0001   |
| Calactin    | 12.54     | 0.820    | <.0001   |
| Calactin    | 14.66     | 0.950    | <.0001   |
| asclepin    | 9.95      | 0.405    | <.0001   |
| asclepin    | Frugoside | 0.795    | <.0001   |
| asclepin    | 12.54     | 0.426    | <.0001   |
| asclepin    | 14.66     | 0.521    | <.0001   |
| asclepin    | Calactin  | 0.577    | <.0001   |
| 18.18       | 9.95      | 0.693    | <.0001   |
| 18.18       | Frugoside | 0.636    | <.0001   |
| 18.18       | 12.54     | 0.913    | <.0001   |
| 18.18       | 14.66     | 0.933    | <.0001   |
| 18.18       | Calactin  | 0.858    | <.0001   |
| 18.18       | asclepin  | 0.418    | <.0001   |
| Uscharin    | 9.95      | 0.145    | 0.0351   |
| Uscharin    | Frugoside | 0.581    | <.0001   |
| Uscharin    | 12.54     | 0.238    | 0.0005   |
| Uscharin    | 14.66     | 0.288    | <.0001   |
| Uscharin    | Calactin  | 0.377    | <.0001   |
| Uscharin    | asclepin  | 0.785    | <.0001   |
| Uscharin    | 18.18     | 0.228    | 0.0008   |
| Voruscharin | 9.95      | -0.018   | 0.7917   |
| Voruscharin | Frugoside | 0.422    | <.0001   |
| Voruscharin | 12.54     | -0.035   | 0.6154   |
| Voruscharin | 14.66     | 0.063    | 0.3654   |
| Voruscharin | Calactin  | 0.161    | 0.0191   |
| Voruscharin | asclepin  | 0.569    | <.0001   |
| Voruscharin | 18.18     | -0.037   | 0.5885   |
| Voruscharin | Uscharin  | 0.675    | <.0001   |

**Table S2. Principal component analysis loadings for the nine individual cardenolides on the two main principal components (Eigen values >1) for plant (85% variation explained) and monarch (72% variation explained) tissues.**

Also shown is the average percentage of that each compound relative to the total cardenolide concentrations. Note that cardenolide compounds are not identical for the two tissues and the PC analyses are completely independent. Compounds are ordered by retention time (RT).

|                                   | Cardenolide | % of the total | PC axis 1 | PC axis 2 |
|-----------------------------------|-------------|----------------|-----------|-----------|
| Plant tissue <sup>1</sup> (n=212) |             |                |           |           |
|                                   | RT9.95      | 6.3            | 0.767     | -0.312    |
|                                   | Frugoside   | 6.0            | 0.876     | 0.249     |
|                                   | RT12.54     | 4.0            | 0.865     | -0.346    |
|                                   | RT14.66     | 11.4           | 0.939     | -0.278    |
|                                   | Calactin    | 5.1            | 0.934     | -0.153    |
|                                   | Asclepin    | 12.2           | 0.739     | 0.555     |
|                                   | RT18.18     | 4.1            | 0.877     | -0.365    |
|                                   | Uscharin    | 10.9           | 0.533     | 0.741     |
|                                   | Voruscharin | 39.9           | 0.283     | 0.843     |
| Insect tissue <sup>2</sup> (n=70) |             |                |           |           |
|                                   | RT5.6       | 3.3            | 0.651     | -0.476    |
|                                   | RT8         | 6.5            | 0.792     | -0.316    |
|                                   | RT8.3       | 1.5            | 0.498     | 0.709     |
|                                   | RT9.5       | 5.9            | 0.643     | 0.282     |
|                                   | Frugoside   | 22.5           | 0.869     | 0.119     |
|                                   | RT12.8      | 2.7            | 0.901     | -0.136    |
|                                   | RT13.5      | 2.7            | 0.805     | 0.077     |
|                                   | Calotropin  | 22.8           | 0.878     | 0.185     |
|                                   | Calactin    | 32.1           | 0.866     | -0.207    |

<sup>1</sup> PC axes are orthogonal and both are highly significant in explaining variation in total plant cardenolides (PC1 R<sup>2</sup>=0.50, PC2 R<sup>2</sup>=0.43).

<sup>2</sup> PC axes are orthogonal and only PC1 was significant in explaining variation in total cardenolides sequestered by monarchs (PC1 R<sup>2</sup>=0.97).

**Table S3. PERMANOVA results analyzing metabolic data based on Bray-Curtis dissimilarities.**

| Source of variation                    | DF | SumSq    | MeanSqs   | F. model | R <sup>2</sup> | P            |
|----------------------------------------|----|----------|-----------|----------|----------------|--------------|
| All chemical extracts                  | 4  | 0.067220 | 0.0168050 | 60.8942  | 0.6477         | <b>0.001</b> |
| Residuals                              | 15 | 0.036563 | 0.0024376 |          | 0.3523         |              |
| Total                                  | 19 | 0.103783 |           |          | 1.0000         |              |
| <i>Pairwise</i>                        |    |          |           |          |                |              |
| LAtV × MA <sub>t</sub>                 | 1  | 0.039476 | 0.039476  | 3.429    | 0.36367        | <b>0.037</b> |
| LAtV × MA <sub>c</sub>                 | 1  | 0.045634 | 0.045634  | 2.1744   | 0.266          | 0.123        |
| LAtV × MA <sub>t</sub> V               | 1  | 0.026582 | 0.026582  | 1.7521   | 0.22601        | 0.143        |
| LAtV × FMA <sub>t</sub> V              | 1  | 0.020933 | 0.020932  | 1.3962   | 0.18877        | 0.181        |
| MA <sub>t</sub> × MA <sub>c</sub>      | 1  | 0.024287 | 0.024287  | 2.2136   | 0.26951        | 0.121        |
| MA <sub>t</sub> × MA <sub>t</sub> V    | 1  | 0.026924 | 0.0269240 | 6.3835   | 0.51548        | <b>0.002</b> |
| MA <sub>t</sub> × FMA <sub>t</sub> V   | 1  | 0.033727 | 0.033727  | 4.3275   | 0.41902        | <b>0.036</b> |
| MA <sub>c</sub> × MA <sub>t</sub> V    | 1  | 0.028296 | 0.0282957 | 3.4997   | 0.3684         | <b>0.024</b> |
| MA <sub>c</sub> × FMA <sub>t</sub> V   | 1  | 0.046877 | 0.046877  | 3.2347   | 0.35028        | <b>0.033</b> |
| MA <sub>t</sub> V × FMA <sub>t</sub> V | 1  | 0.021856 | 0.0218561 | 2.2519   | 0.27289        | <b>0.038</b> |

LAtV: Leaf of *A. tuberosa* painted with voruscharin; MA<sub>t</sub>: Monarchs on *A. tuberosa*;  
MA<sub>c</sub>: Monarchs on *A. curassavica*; MA<sub>t</sub>V: Monarchs on *A. tuberosa* painted with voruscharin;  
FMA<sub>t</sub>V: Frass from monarchs fed *A. tuberosa* painted with voruscharin.  
DF - degrees of freedom; SumSq - sum of squares; MeanSqr - mean squares.  
P-values based on 999 permutations (lowest P-value possible 0.001).



**Table S4. The relative inhibitory potential of seven isolated cardenolides on the sensitive porcine and typically-resistant monarch butterfly Na-K-ATPase (See also Figure 3).**

IC<sub>50</sub> is the concentration ( $\mu$ M) at which the enzyme is inhibited by 50%. Sequestered+ indicates that these compounds are sequestered intact from consumed leaves as well as converted products from consumed voruscharin and uscharin.

|                             | <b>Porcine<br/>ATPase (IC<sub>50</sub>)</b> | <b>Monarch<br/>ATPase (IC<sub>50</sub>)</b> | <b>IC<sub>50</sub><br/>ratio</b> | <b>Total<br/>n</b> |
|-----------------------------|---------------------------------------------|---------------------------------------------|----------------------------------|--------------------|
| Ouabain (standard)          | 0.81                                        | 122.09                                      | 151                              | 11                 |
| Digitoxin (standard)        | 0.49                                        | 16.25                                       | 33                               | 12                 |
| Frugoside (sequestered)     | 0.37                                        | 27.80                                       | 76                               | 8                  |
| Calotropin (sequestered+)   | 0.27                                        | 10.90                                       | 40                               | 6                  |
| Calactin (sequestered+)     | 0.24                                        | 3.21                                        | 13                               | 6                  |
| Uscharin (unsequestered)    | 0.78                                        | 1.00                                        | 1                                | 12                 |
| Voruscharin (unsequestered) | 0.46                                        | 2.02                                        | 4                                | 26                 |

**Table S5. Poisson GLM model fits for predicting monarch oviposition on 212 *Asclepias curassavica* plants in a common greenhouse environment.**

Breaking down the predictors by cardenolide principal components, the four of nine significant individual cardenolides, and two quercetin glycosides (there was no indication of a quadratic fit for the quercetin glycosides). Voruscharin concentration dominates PC2 and was not a significant predictor in individual analyses.

| Plant compound       | Factor                                    | L-R $\chi^2$ | p      |
|----------------------|-------------------------------------------|--------------|--------|
| PC1                  | PC1                                       | 4.687        | 0.030  |
|                      | PC1 squared                               | 5.317        | 0.021  |
|                      | Plant height                              | 14.628       | <0.001 |
| PC2                  | PC2                                       | 0.2249       | 0.617  |
|                      | PC2 squared                               | 0.135        | 0.713  |
|                      | Plant height                              | 13.746       | <0.001 |
| Frugoside            | Frugoside                                 | 6.156        | 0.013  |
|                      | Frugoside squared                         | 6.161        | 0.013  |
|                      | Plant height                              | 12.677       | <0.001 |
| Calactin             | Calactin                                  | 6.228        | 0.013  |
|                      | Calactin squared                          | 5.282        | 0.022  |
|                      | Plant height                              | 16.529       | <0.001 |
| RT14.66              | RT14.66                                   | 7.386        | 0.007  |
|                      | RT14.66 squared                           | 6.978        | 0.008  |
|                      | Plant height                              | 14.907       | <0.001 |
| RT18.18              | RT18.18                                   | 7.388        | <0.001 |
|                      | RT18.18 squared                           | 8.053        | 0.004  |
|                      | Plant height                              | 14.657       | <0.001 |
| Quercetin glycosides | quercetin-rhamno-di-hexoside <sup>1</sup> | 0.115        | 0.731  |
|                      | quercetin-rhamno-hexoside <sup>2</sup>    | 0.002        | 0.960  |
|                      | Plant height                              | 14.285       | <0.001 |

<sup>1</sup> Molecular mass 756 g/mol

<sup>2</sup> Molecular mass 610 g/mol

**Table S6. Effects of two quercetin glycosides on monarch butterfly oviposition, tested with pure compounds in cages. >1 gram fresh leaf equivalent of each compound was added to each sponge.**

A mixed-model ANOVA was used (random effect was blocking cage): overall effect of treatment  $F_{2,27.98}=9.901$ ,  $p<0.001$ .

| Compound                                  | Eggs laid<br>(LS mean) | Standard error | Tukey<br>comparison |
|-------------------------------------------|------------------------|----------------|---------------------|
| Control                                   | 39.6                   | 12.2           | A                   |
| quercetin-rhamno-di-hexoside <sup>1</sup> | 44.8                   | 13.7           | A                   |
| quercetin-rhamno-hexoside <sup>2</sup>    | 84.9                   | 14.2           | B                   |

<sup>1</sup> Molecular mass 756 g/mol

<sup>2</sup> Molecular mass 610 g/mol

**Table S7. HRMS data of the cardenolides ions detected in samples.**

To simplify the table, only MS data from one replicate is listed for each precursor ion.

| Cardenolide           | Formula                                           | Precursor ion         | Observed <i>m/z</i>                            | Calculated <i>m/z</i> | $\Delta m/z$ (ppm) | Sample (replicate number)                      |      |                                                |
|-----------------------|---------------------------------------------------|-----------------------|------------------------------------------------|-----------------------|--------------------|------------------------------------------------|------|------------------------------------------------|
| Voruscharin           | C <sub>31</sub> H <sub>43</sub> NO <sub>8</sub> S | [M+H] <sup>+</sup>    | 590.2781                                       | 590.2775              | -1.0               | <i>A. tuberosa</i> vor. Treated foliage (1)    |      |                                                |
|                       |                                                   |                       |                                                | 590.2782              | 0.1                | Frass from cats (1)                            |      |                                                |
|                       |                                                   | [M+Na] <sup>+</sup>   | 612.2601                                       | 612.2592              | -1.4               | <i>A. tuberosa</i> vor. Treated foliage (1)    |      |                                                |
|                       |                                                   |                       |                                                | 612.2605              | 0.6                | Frass from cats (1)                            |      |                                                |
|                       |                                                   | [M-H] <sup>-</sup>    | 588.2636                                       | 588.2634              | -0.3               | <i>A. tuberosa</i> vor. Treated foliage (1)    |      |                                                |
|                       |                                                   |                       |                                                | 588.2648              | 2.0                | Frass from cats (1)                            |      |                                                |
|                       |                                                   | [M+FA-H] <sup>-</sup> | 634.2691                                       | 634.2689              | -0.3               | <i>A. tuberosa</i> vor. Treated foliage (1)    |      |                                                |
|                       |                                                   |                       |                                                | 634.2689              | -0.3               | Frass from cats (1)                            |      |                                                |
|                       |                                                   | Uscharidin            | C <sub>29</sub> H <sub>38</sub> O <sub>9</sub> | [M+H] <sup>+</sup>    | 531.2588           | 531.2585                                       | -0.5 | <i>A. tuberosa</i> vor. Treated foliage (1)    |
|                       |                                                   |                       |                                                |                       |                    | 531.2588                                       | 0.0  | Frass from cats (1)                            |
| 531.2592              | 0.7                                               |                       |                                                |                       |                    | <i>A. curassavica</i> feds cats (1)            |      |                                                |
| [M+Na] <sup>+</sup>   | 553.2408                                          |                       |                                                | 553.2403              | -0.9               | <i>A. tuberosa</i> vor. Treated foliage (1)    |      |                                                |
|                       |                                                   |                       |                                                | 553.2402              | -1.0               | Frass from cats (1)                            |      |                                                |
|                       |                                                   |                       |                                                | 553.2416              | 1.4                | <i>A. curassavica</i> feds cats (1)            |      |                                                |
| [M-H] <sup>-</sup>    | 529.2443                                          |                       |                                                | 529.2440              | -0.5               | <i>A. tuberosa</i> vor. Treated foliage (1)    |      |                                                |
|                       |                                                   |                       |                                                | 529.2443              | 0.0                | Frass from cats (1)                            |      |                                                |
|                       |                                                   |                       |                                                | 529.2443              | 0.0                | <i>A. curassavica</i> feds cats (1)            |      |                                                |
| [M+FA-H] <sup>-</sup> | 575.2498                                          |                       |                                                | 575.2498              | 0.0                | <i>A. tuberosa</i> vor. Treated foliage (1)    |      |                                                |
|                       |                                                   |                       |                                                | 575.2501              | 0.5                | Frass from cats (1)                            |      |                                                |
|                       |                                                   |                       |                                                | 575.2500              | 0.3                | <i>A. curassavica</i> feds cats (1)            |      |                                                |
| Calotropin            | C <sub>29</sub> H <sub>40</sub> O <sub>9</sub>    |                       |                                                | [M+H] <sup>+</sup>    | 533.2744           | 533.2737                                       | -1.3 | <i>A. tuberosa</i> fed cats w/ voruscharin (1) |
|                       |                                                   |                       |                                                |                       |                    | 533.2745                                       | 0.1  | Frass from cats (1)                            |
|                       |                                                   | 533.2740              | -0.7                                           |                       |                    | <i>A. curassavica</i> feds cats (1)            |      |                                                |
|                       |                                                   | [M+Na] <sup>+</sup>   | 555.2564                                       | 555.2549              | -2.7               | <i>A. tuberosa</i> fed cats w/ voruscharin (1) |      |                                                |
|                       |                                                   |                       |                                                | 555.2546              | -3.2               | Frass from cats (1)                            |      |                                                |
|                       |                                                   |                       |                                                | 555.2553              | -1.9               | <i>A. curassavica</i> feds cats (1)            |      |                                                |
|                       |                                                   | [M-H] <sup>-</sup>    | 531.2599                                       | 531.2590              | -1.6               | <i>A. tuberosa</i> fed cats w/ voruscharin (1) |      |                                                |
|                       |                                                   |                       |                                                | 531.2612              | 2.4                | Frass from cats (1)                            |      |                                                |
|                       |                                                   |                       |                                                | 531.2597              | -0.3               | <i>A. curassavica</i> feds cats (1)            |      |                                                |
|                       |                                                   | [M+FA-H] <sup>-</sup> | 577.2654                                       | 577.2655              | 0.1                | <i>A. tuberosa</i> fed cats w/ voruscharin (1) |      |                                                |
|                       |                                                   |                       |                                                | 577.2659              | 0.8                | Frass from cats (1)                            |      |                                                |
|                       |                                                   |                       |                                                | 577.2665              | 1.9                | <i>A. curassavica</i> feds cats (1)            |      |                                                |

|          |                                                |                       |          |              |      |                                                |
|----------|------------------------------------------------|-----------------------|----------|--------------|------|------------------------------------------------|
| Calactin | C <sub>29</sub> H <sub>40</sub> O <sub>9</sub> | [M+H] <sup>+</sup>    | 533.2744 | 533.2733     | -2.0 | <i>A. tuberosa</i> fed cats w/ voruscharin (1) |
|          |                                                |                       |          | 533.2741     | -0.5 | Frass from cats (1)                            |
|          |                                                |                       |          | 533.2742     | -0.3 | <i>A. curassavica</i> feds cats (1)            |
|          |                                                | [M+Na] <sup>+</sup>   | 555.2564 | 555.2552     | -2.1 | <i>A. tuberosa</i> fed cats w/ voruscharin (1) |
|          |                                                |                       |          | not detected | -    | Frass from cats (1)                            |
|          |                                                |                       |          | 555.2554     | -1.8 | <i>A. curassavica</i> feds cats (1)            |
|          |                                                | [M-H] <sup>-</sup>    | 531.2599 | 531.2596     | -0.5 | <i>A. tuberosa</i> fed cats w/ voruscharin (1) |
|          |                                                |                       |          | 531.2593     | -1.1 | Frass from cats (1)                            |
|          |                                                |                       |          | 531.2596     | -0.5 | <i>A. curassavica</i> feds cats (1)            |
|          |                                                | [M+FA-H] <sup>-</sup> | 577.2654 | 577.2654     | 0.0  | <i>A. tuberosa</i> fed cats w/ voruscharin (1) |
|          |                                                |                       |          | 577.2659     | 0.8  | Frass from cats (1)                            |
|          |                                                |                       |          | 577.2664     | 1.7  | <i>A. curassavica</i> feds cats (1)            |

---

## References

1. Parhira S, Zhu G-Y, Jiang R-W, Liu L, Bai L-P, & Jiang Z-H (2014) 2'-*Epi*-uscharin from the latex of *Calotropis gigantea* with HIF-1 inhibitory activity. *Sci. Rep.* 4:4748.
2. Haribal M & Renwick JA (1996) Oviposition stimulants for the monarch butterfly: flavonol glycosides from *Asclepias curassavica*. *Phytochemistry* 41:139-144.
